# Supplementary material for: Development of a new nanoparticle sizer equipped with a 12-channel multi-port differential mobility analyzer and multi-condensation particle counters
Source: Copernicus journal article supplement (doi:10.5194/amt-13-1551-2020), 2020-04-01
Supplement: Supplementary file 1 [file amt-13-1551-2020-supplement.pdf]

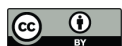

## *Supplement of*

# **Development of a new nanoparticle sizer equipped with a 12-channel multi-port differential mobility analyzer and multi-condensation particle counters**

**Hong Ku Lee et al.**

*Correspondence to:* Kang-Ho Ahn (khahn@hanyang.ac.kr)

The copyright of individual parts of the supplement might differ from the CC BY 4.0 License.

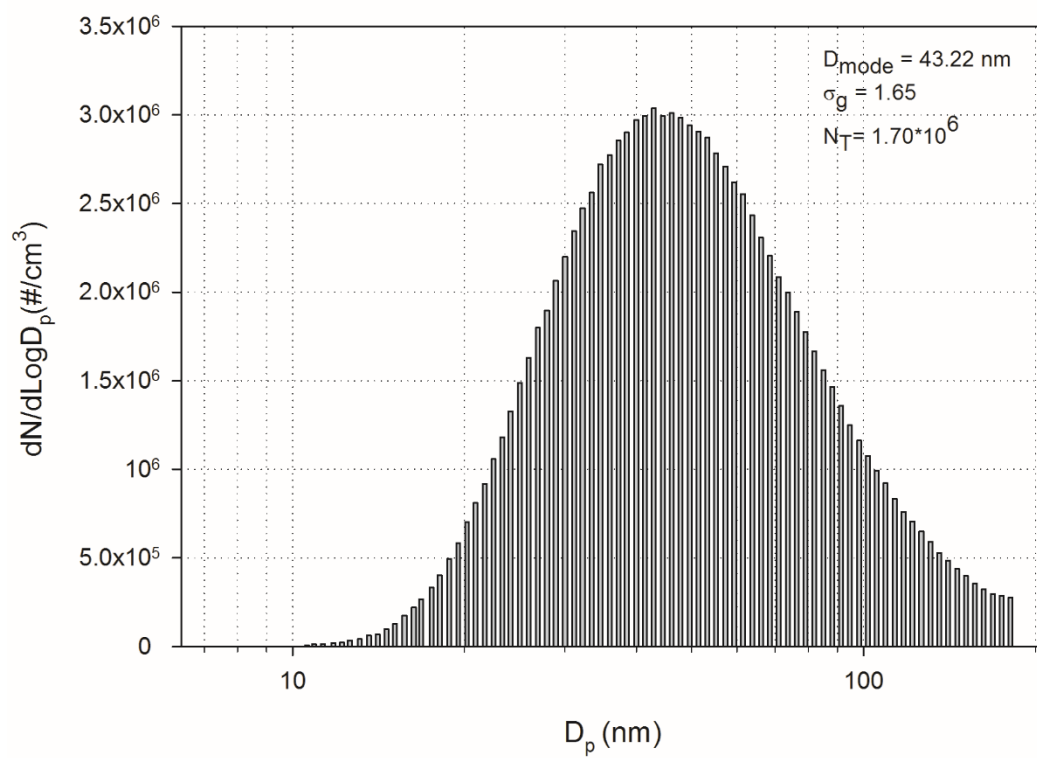

**Figure S1. Particle size distribution of atomized NaCl particles. The mode size and geometric standard deviation of the particles were 43.22 nm and 1.65.**

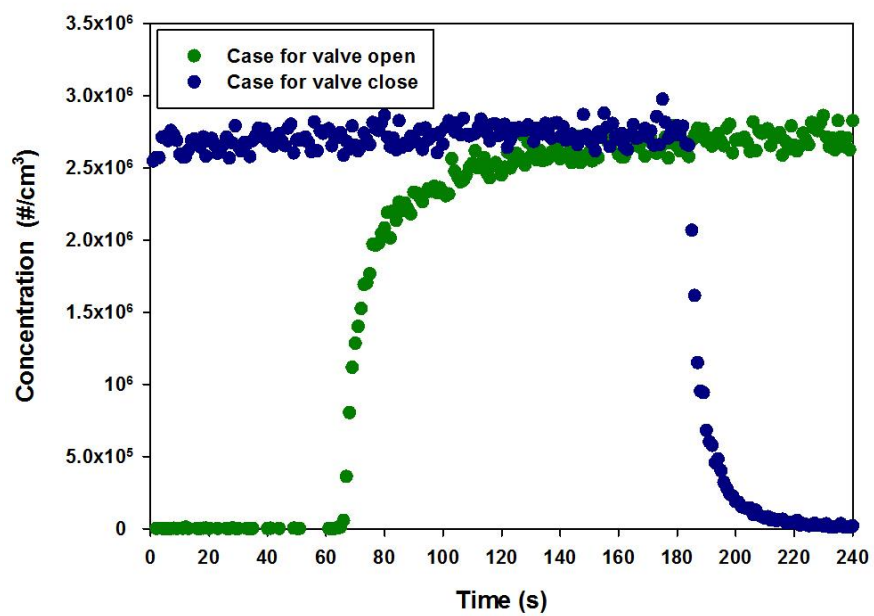

Figure S2. Change in particle concentration at the mode diameter as a function of time.
